# Supplementary material for: Surface Treatment of Dental Mini-Sized Implants and Screws: A Systematic Review with Meta-Analysis
Source: MDPI journal article supplement (doi:10.3390/jfb15030068), 2024-03-10
Supplement: s1 [file s1]

# Surface Treatment of Dental Mini-Sized Implants and Screws: A Systematic Review with Meta-Analysis

Ana Luísa Figueiredo <sup>1</sup>, Raquel Travassos <sup>1,2,3,4</sup>, Catarina Nunes <sup>1,2,3,4</sup>, Madalena Prata Ribeiro <sup>1</sup>, Mariana Santos <sup>1</sup>, Flavia Iaculli <sup>5</sup>, Anabela Baptista Paula <sup>1,2,3,4,6,\*</sup>, Carlos Miguel Marto <sup>2,3,4,6,7</sup>, Francisco Caramelo <sup>2,3,4</sup>, Inês Francisco <sup>1,2,3,4,\*,†</sup> and Francisco Vale <sup>1,2,3,4,†</sup>

<sup>1</sup> Institute of Orthodontics, Faculty of Medicine, University of Coimbra, 3000-354 Coimbra, Portugal; uc2018277869@student.uc.pt (A.L.F.); uc47231@uc.pt (R.T.); uc47230@uc.pt (C.N.); uc2020181154@student.uc.pt (M.P.R.); uc2014107642@student.uc.pt (M.S.); fvale@fmed.uc.pt (F.V.)

<sup>2</sup> Laboratory for Evidence-Based Sciences and Precision Dentistry (LACBE-MDP), Faculty of Medicine, University of Coimbra, 3000-354 Coimbra, Portugal; cmiguel.marto@uc.pt (C.M.M.); fcaramelo@fmed.uc.pt (F.C.)

<sup>3</sup> Institute for Clinical and Biomedical Research (iCBR), Area of Environment Genetics and Oncobiology (CIMAGO), Faculty of Medicine, University of Coimbra, 3000-354 Coimbra, Portugal

<sup>4</sup> Clinical Academic Center of Coimbra (CACC), 3000-354 Coimbra, Portugal

<sup>5</sup> Department of Neurosciences, Reproductive and Odontostomatological Sciences, University of Naples "Federico II", 80138 Naples, Italy; flavia.iaculli@unina.it

<sup>6</sup> Institute of Integrated Clinical Practice, Faculty of Medicine, University of Coimbra, 3000-354 Coimbra, Portugal

<sup>7</sup> Institute of Experimental Pathology, Faculty of Medicine, University of Coimbra, 3000-354 Coimbra, Portugal

\* Correspondence: anabelabppaula@sapo.pt (A.B.P.); ifrancisco@fmed.uc.pt (I.F.)

† These authors contributed equally to this work.

**Table S1.** Search Strategies/Phrases.

| Database                  | Search Strategy                                                                                                                                                                                                                                                                                                                                                                                                                                                                                                                                                                                                                                                                                                                                                                                                                                                                                                                                                                                                                                                                                                                                                                                                                       |
|---------------------------|---------------------------------------------------------------------------------------------------------------------------------------------------------------------------------------------------------------------------------------------------------------------------------------------------------------------------------------------------------------------------------------------------------------------------------------------------------------------------------------------------------------------------------------------------------------------------------------------------------------------------------------------------------------------------------------------------------------------------------------------------------------------------------------------------------------------------------------------------------------------------------------------------------------------------------------------------------------------------------------------------------------------------------------------------------------------------------------------------------------------------------------------------------------------------------------------------------------------------------------|
| <b>PubMed via Medline</b> | (Miniscrew* OR mini-screw* OR mini-implant* OR "mini implant*" OR "Mini Dental Implant*" OR miniscrew* OR micro-implant* OR "Dental Implants, Mini" OR "Dental Implant, Mini" OR "Skeletal anchorage" OR "absolute anchorage" OR "Temporary anchorage device*" OR "Orthodontic Anchorage Procedures"[Mesh] OR "Orthodontic Anchorage Procedure*" OR "Anchorage Procedure, Orthodontic" OR "Anchorage Procedures, Orthodontic" OR "Procedure, Orthodontic Anchorage" OR "Procedures, Orthodontic Anchorage" OR "Orthodontic Anchorage Technique*" OR "Anchorage Technique, Orthodontic" OR "Anchorage Techniques, Orthodontic" OR "Technique, Orthodontic Anchorage" OR "Techniques, Orthodontic Anchorage") AND ("Surface Properties"[Mesh] OR surface* OR "Osseointegration"[Mesh] OR Osseointegration OR "Endosseous Healing" OR "Healing, Peri-implant Endosseous" OR "Healings, Peri-implant Endosseous" OR "Mechanical stability") AND ("Orthodontics"[Mesh] OR Orthodontic*)                                                                                                                                                                                                                                                    |
| <b>Cochrane Library</b>   | ID                                                                                                                                                                                                                                                                                                                                                                                                                                                                                                                                                                                                                                                                                                                                                                                                                                                                                                                                                                                                                                                                                                                                                                                                                                    |
|                           | #1 Search                                                                                                                                                                                                                                                                                                                                                                                                                                                                                                                                                                                                                                                                                                                                                                                                                                                                                                                                                                                                                                                                                                                                                                                                                             |
|                           | #2 Miniscrew*                                                                                                                                                                                                                                                                                                                                                                                                                                                                                                                                                                                                                                                                                                                                                                                                                                                                                                                                                                                                                                                                                                                                                                                                                         |
|                           | #3 mini-screw*                                                                                                                                                                                                                                                                                                                                                                                                                                                                                                                                                                                                                                                                                                                                                                                                                                                                                                                                                                                                                                                                                                                                                                                                                        |
|                           | #4 mini-implant*                                                                                                                                                                                                                                                                                                                                                                                                                                                                                                                                                                                                                                                                                                                                                                                                                                                                                                                                                                                                                                                                                                                                                                                                                      |
|                           | #5 "mini implant"                                                                                                                                                                                                                                                                                                                                                                                                                                                                                                                                                                                                                                                                                                                                                                                                                                                                                                                                                                                                                                                                                                                                                                                                                     |
|                           | #6 "Mini Dental Implant"                                                                                                                                                                                                                                                                                                                                                                                                                                                                                                                                                                                                                                                                                                                                                                                                                                                                                                                                                                                                                                                                                                                                                                                                              |
|                           | #7 miniscrew*                                                                                                                                                                                                                                                                                                                                                                                                                                                                                                                                                                                                                                                                                                                                                                                                                                                                                                                                                                                                                                                                                                                                                                                                                         |
|                           | #8 micro-implant*                                                                                                                                                                                                                                                                                                                                                                                                                                                                                                                                                                                                                                                                                                                                                                                                                                                                                                                                                                                                                                                                                                                                                                                                                     |
|                           | #9 "Dental Implants, Mini"                                                                                                                                                                                                                                                                                                                                                                                                                                                                                                                                                                                                                                                                                                                                                                                                                                                                                                                                                                                                                                                                                                                                                                                                            |
|                           | #10 "Dental Implant, Mini"                                                                                                                                                                                                                                                                                                                                                                                                                                                                                                                                                                                                                                                                                                                                                                                                                                                                                                                                                                                                                                                                                                                                                                                                            |
|                           | #11 "Skeletal anchorage"                                                                                                                                                                                                                                                                                                                                                                                                                                                                                                                                                                                                                                                                                                                                                                                                                                                                                                                                                                                                                                                                                                                                                                                                              |
|                           | #12 "absolute anchorage"                                                                                                                                                                                                                                                                                                                                                                                                                                                                                                                                                                                                                                                                                                                                                                                                                                                                                                                                                                                                                                                                                                                                                                                                              |
|                           | #13 "Temporary anchorage device"                                                                                                                                                                                                                                                                                                                                                                                                                                                                                                                                                                                                                                                                                                                                                                                                                                                                                                                                                                                                                                                                                                                                                                                                      |
|                           | MeSH descriptor: [Orthodontic Anchorage Procedures] explode all trees                                                                                                                                                                                                                                                                                                                                                                                                                                                                                                                                                                                                                                                                                                                                                                                                                                                                                                                                                                                                                                                                                                                                                                 |
|                           | #14 "Orthodontic Anchorage Procedure"                                                                                                                                                                                                                                                                                                                                                                                                                                                                                                                                                                                                                                                                                                                                                                                                                                                                                                                                                                                                                                                                                                                                                                                                 |
|                           | #15 "Anchorage Procedure, Orthodontic"                                                                                                                                                                                                                                                                                                                                                                                                                                                                                                                                                                                                                                                                                                                                                                                                                                                                                                                                                                                                                                                                                                                                                                                                |
|                           | #16 "Anchorage Procedures, Orthodontic"                                                                                                                                                                                                                                                                                                                                                                                                                                                                                                                                                                                                                                                                                                                                                                                                                                                                                                                                                                                                                                                                                                                                                                                               |
|                           | #17 "Procedure, Orthodontic Anchorage"                                                                                                                                                                                                                                                                                                                                                                                                                                                                                                                                                                                                                                                                                                                                                                                                                                                                                                                                                                                                                                                                                                                                                                                                |
|                           | #18 "Procedures, Orthodontic Anchorage"                                                                                                                                                                                                                                                                                                                                                                                                                                                                                                                                                                                                                                                                                                                                                                                                                                                                                                                                                                                                                                                                                                                                                                                               |
|                           | #19 "Orthodontic Anchorage Technique"                                                                                                                                                                                                                                                                                                                                                                                                                                                                                                                                                                                                                                                                                                                                                                                                                                                                                                                                                                                                                                                                                                                                                                                                 |
|                           | #20 "Anchorage Technique, Orthodontic"                                                                                                                                                                                                                                                                                                                                                                                                                                                                                                                                                                                                                                                                                                                                                                                                                                                                                                                                                                                                                                                                                                                                                                                                |
|                           | #21 "Anchorage Techniques, Orthodontic"                                                                                                                                                                                                                                                                                                                                                                                                                                                                                                                                                                                                                                                                                                                                                                                                                                                                                                                                                                                                                                                                                                                                                                                               |
|                           | #22 "Technique, Orthodontic Anchorage"                                                                                                                                                                                                                                                                                                                                                                                                                                                                                                                                                                                                                                                                                                                                                                                                                                                                                                                                                                                                                                                                                                                                                                                                |
|                           | #23 "Techniques, Orthodontic Anchorage"                                                                                                                                                                                                                                                                                                                                                                                                                                                                                                                                                                                                                                                                                                                                                                                                                                                                                                                                                                                                                                                                                                                                                                                               |
|                           | MeSH descriptor: [Surface Properties] explode all trees                                                                                                                                                                                                                                                                                                                                                                                                                                                                                                                                                                                                                                                                                                                                                                                                                                                                                                                                                                                                                                                                                                                                                                               |
|                           | #24 surface*                                                                                                                                                                                                                                                                                                                                                                                                                                                                                                                                                                                                                                                                                                                                                                                                                                                                                                                                                                                                                                                                                                                                                                                                                          |
|                           | MeSH descriptor: [Osseointegration] explode all trees                                                                                                                                                                                                                                                                                                                                                                                                                                                                                                                                                                                                                                                                                                                                                                                                                                                                                                                                                                                                                                                                                                                                                                                 |
|                           | #25 Osseointegration                                                                                                                                                                                                                                                                                                                                                                                                                                                                                                                                                                                                                                                                                                                                                                                                                                                                                                                                                                                                                                                                                                                                                                                                                  |
|                           | #26 "Endosseous Healing"                                                                                                                                                                                                                                                                                                                                                                                                                                                                                                                                                                                                                                                                                                                                                                                                                                                                                                                                                                                                                                                                                                                                                                                                              |
|                           | #27 "Healing, Peri-implant Endosseous"                                                                                                                                                                                                                                                                                                                                                                                                                                                                                                                                                                                                                                                                                                                                                                                                                                                                                                                                                                                                                                                                                                                                                                                                |
|                           | #28 "Healings, Peri-implant Endosseous"                                                                                                                                                                                                                                                                                                                                                                                                                                                                                                                                                                                                                                                                                                                                                                                                                                                                                                                                                                                                                                                                                                                                                                                               |
|                           | #29 "Mechanical stability"                                                                                                                                                                                                                                                                                                                                                                                                                                                                                                                                                                                                                                                                                                                                                                                                                                                                                                                                                                                                                                                                                                                                                                                                            |
|                           | MeSH descriptor: [Orthodontics] explode all trees                                                                                                                                                                                                                                                                                                                                                                                                                                                                                                                                                                                                                                                                                                                                                                                                                                                                                                                                                                                                                                                                                                                                                                                     |
|                           | #30 Orthodontic*                                                                                                                                                                                                                                                                                                                                                                                                                                                                                                                                                                                                                                                                                                                                                                                                                                                                                                                                                                                                                                                                                                                                                                                                                      |
|                           | #31                                                                                                                                                                                                                                                                                                                                                                                                                                                                                                                                                                                                                                                                                                                                                                                                                                                                                                                                                                                                                                                                                                                                                                                                                                   |
|                           | #32 (#1 OR #2 OR #3 OR #4 OR #5 OR #6 OR #7 OR #8 OR #9 OR #10 OR #11 OR #12 #13 OR #14 OR #15 OR #16 OR #17 OR #18 OR #19 OR #20 OR                                                                                                                                                                                                                                                                                                                                                                                                                                                                                                                                                                                                                                                                                                                                                                                                                                                                                                                                                                                                                                                                                                  |
|                           | #33 #21 OR #22 OR #23) AND (#24 OR #25 OR #26 OR #27 OR #28 OR #29 OR #30 OR #31) AND (#32 OR #33)                                                                                                                                                                                                                                                                                                                                                                                                                                                                                                                                                                                                                                                                                                                                                                                                                                                                                                                                                                                                                                                                                                                                    |
|                           | #34                                                                                                                                                                                                                                                                                                                                                                                                                                                                                                                                                                                                                                                                                                                                                                                                                                                                                                                                                                                                                                                                                                                                                                                                                                   |
| <b>Embase</b>             | (miniscrew*:ti,ab,kw OR 'mini screw':ti,ab,kw OR 'mini implant':ti,ab,kw OR 'mini dental implant':ti,ab,kw OR miniscrew*:ti,ab,kw OR 'micro implant':ti,ab,kw OR 'dental implants, mini':ti,ab,kw OR 'dental implant, mini':ti,ab,kw OR 'skeletal anchorage':ti,ab,kw OR 'absolute anchorage':ti,ab,kw OR 'temporary anchorage device':ti,ab,kw OR tad:ti,ab,kw OR tads:ti,ab,kw OR 'orthodontic anchorage'/exp OR 'orthodontic anchorage procedure':ti,ab,kw OR 'anchorage procedure, orthodontic':ti,ab,kw OR 'anchorage procedures, orthodontic':ti,ab,kw OR 'procedure, orthodontic anchorage':ti,ab,kw OR 'procedures, orthodontic anchorage':ti,ab,kw OR 'orthodontic anchorage technique':ti,ab,kw OR 'anchorage technique, orthodontic':ti,ab,kw OR 'anchorage techniques, orthodontic':ti,ab,kw OR 'technique, orthodontic anchorage':ti,ab,kw OR 'techniques, orthodontic anchorage':ti,ab,kw) AND ('surface property'/exp OR surface*:ti,ab,kw OR 'osseointegration'/exp OR osseointegration:ti,ab,kw OR 'endosseous healing':ti,ab,kw OR 'healing, peri-implant endosseous':ti,ab,kw OR 'healings, peri-implant endosseous':ti,ab,kw OR 'mechanical stability':ti,ab,kw) AND ('orthodontics'/exp OR orthodontic*:ti,ab,kw |
| <b>Web of Science</b>     | (Miniscrew* OR mini-screw* OR mini-implant* OR "mini implant*" OR "Mini Dental Implant*" OR miniscrew* OR micro-implant* OR "Dental Implants, Mini" OR "Dental Implant, Mini" OR "Skeletal anchorage" OR "absolute anchorage" OR "Temporary anchorage device*" OR "Orthodontic Anchorage Procedure*" OR "Anchorage Procedure, Orthodontic" OR "Anchorage Procedures, Orthodontic" OR "Procedure, Orthodontic Anchorage" OR "Procedures, Orthodontic Anchorage" OR "Orthodontic Anchorage Technique*" OR "Anchorage Technique, Orthodontic" OR "Anchorage Techniques, Orthodontic" OR "Technique, Orthodontic Anchorage" OR "Techniques, Orthodontic Anchorage") AND (surface* OR Osseointegration OR "Endosseous Healing" OR "Healing, Peri-implant Endosseous" OR "Healings, Peri-implant Endosseous" OR "Mechanical stability") AND (Orthodontic*)                                                                                                                                                                                                                                                                                                                                                                                  |

**Table S2.** Assessment of Risk of Bias for Randomized Controlled Clinical Trials.

|                                   | Randomization Process | Deviations from the Intended | Missing Outcome Data | Measurement of Outcome | Selection of the Reported Result | Overall Bias |
|-----------------------------------|-----------------------|------------------------------|----------------------|------------------------|----------------------------------|--------------|
| Noorollahian, S. et al. 2012 [39] | Y                     | Y                            | Y                    | Y                      | Y                                | Y            |
| Park, H.J. et al. 2019 [117]      | Y                     | Y                            | Y                    | Y                      | Y                                | Y            |
| Rampurawala, A. et al. 2020 [14]  | Y                     | Y                            | Y                    | Y                      | Y                                | Y            |
| Matys, J. et al. 2020 [114]       | Y                     | Y                            | Y                    | SC                     | Y                                | SC           |
| Flieger, R. et al. 2019 [115]     | Y                     | Y                            | Y                    | SC                     | Y                                | SC           |
| Ekizer, A. et al. 2016 [18]       | Y                     | Y                            | Y                    | Y                      | Y                                | Y            |
| Schaetzle, M.A. et al. 2009 [116] | Y                     | Y                            | Y                    | Y                      | Y                                | Y            |
| Manni, A. et al. 2022 [17]        | Y                     | Y                            | Y                    | Y                      | Y                                | Y            |
| Moghaddam, S. et al. 2021 [21]    | N                     | Y                            | Y                    | Y                      | Y                                | N            |
| Durrani, O. et al, 2023[110]      | Y                     | SC                           | Y                    | Y                      | Y                                | SC           |
| Ravi, J. et al, 2023[111]         | Y                     | Y                            | Y                    | Y                      | Y                                | Y            |

Y – yes; SC – some concerns, N - no.

**Table S3.** Assessment of Risk of Bias for Non-Randomized Clinical Trials.

|                                 | Bias Due to Confounding | Selection of Participants | Classification of Interventions | Desviations from Intended Interventions | Missing Data | Measurement of Outcomes | Selection of the reported Result | Overall Bias |
|---------------------------------|-------------------------|---------------------------|---------------------------------|-----------------------------------------|--------------|-------------------------|----------------------------------|--------------|
| Calderón, J.H. et al. 2019[113] | Y                       | Y                         | Y                               | Y                                       | Y            | M                       | Y                                | M            |
| Kim, S-H. et al. 2012[112]      | Y                       | Y                         | Y                               | Y                                       | Y            | M                       | Y                                | M            |
| Bratu, D. C. et al. 2014[15]    | Y                       | Y                         | Y                               | Y                                       | Y            | M                       | Y                                | M            |
| Chaddad, K. et al. 2008[16]     | Y                       | Y                         | Y                               | Y                                       | Y            | M                       | Y                                | M            |
| Kim, S-H. et al. 2008[73]       | Y                       | Y                         | Y                               | Y                                       | Y            | M                       | Y                                | M            |

Y - yes, M - moderate.

**Table S4.** Assessment of Risk of Bias for In vivo Studies.

|                                      | Sequence Generation | Baseline Characteristics | Allocation Concealment | Random Housing | Blinding | Random Outcome Assessment | Blinding of outcome evaluation | Incomplete Outcome Data | Selective Outcome reporting | Other sources of bias |
|--------------------------------------|---------------------|--------------------------|------------------------|----------------|----------|---------------------------|--------------------------------|-------------------------|-----------------------------|-----------------------|
| Auciello, O. et al. 2022[107]        | N                   | Y                        | N                      | U              | N        | Y                         | Y                              | Y                       | Y                           | Y                     |
| Bakopoulou, A. et al. 2019[103]      | Y                   | Y                        | Y                      | Y              | U        | Y                         | U                              | Y                       | Y                           | Y                     |
| Miura, K. et al. 2014[86]            | N                   | Y                        | N                      | U              | N        | Y                         | Y                              | Y                       | Y                           | Y                     |
| Cho, Y-C. et al. 2021[105]           | Y                   | Y                        | N                      | Y              | N        | Y                         | U                              | Y                       | Y                           | Y                     |
| Niwa, K. et al. 2009[76]             | N                   | Y                        | N                      | U              | N        | Y                         | U                              | U                       | Y                           | Y                     |
| Cho, Y-C. et al. 2013[83]            | N                   | Y                        | N                      | N              | N        | Y                         | U                              | Y                       | Y                           | Y                     |
| Yadav, S. et al. 2015[50]            | Y                   | Y                        | Y                      | Y              | Y        | Y                         | Y                              | Y                       | Y                           | Y                     |
| Kim, H-Y. et al. 2016[52]            | N                   | Y                        | N                      | U              | N        | Y                         | N                              | Y                       | Y                           | Y                     |
| Lee, Y-T. et al. 2024[109]           | Y                   | Y                        | N                      | Y              | N        | Y                         | N                              | Y                       | Y                           | Y                     |
| Seker, E.D. et al. 2022[108]         | Y                   | Y                        | N                      | U              | N        | Y                         | N                              | Y                       | Y                           | Y                     |
| Li, M. et al. 2022[67]               | N                   | Y                        | N                      | Y              | N        | Y                         | Y                              | Y                       | Y                           | Y                     |
| Miyawaki, S. et al. 2015[45]         | N                   | Y                        | N                      | N              | N        | U                         | N                              | Y                       | Y                           | N                     |
| El-Wassefy, N. et al. 2015[88]       | N                   | Y                        | N                      | U              | N        | Y                         | N                              | Y                       | Y                           | Y                     |
| Jang, I. et al. 2017[99]             | N                   | Y                        | N                      | Y              | N        | Y                         | N                              | N                       | Y                           | Y                     |
| Karmarker, S. et al. 2012[80]        | N                   | Y                        | N                      | Y              | N        | Y                         | N                              | Y                       | Y                           | Y                     |
| Jang, I. et al. 2015[90]             | N                   | Y                        | N                      | Y              | N        | Y                         | U                              | Y                       | Y                           | Y                     |
| Tabuchi, M. et al. 2015[49]          | N                   | Y                        | N                      | Y              | N        | Y                         | N                              | Y                       | Y                           | Y                     |
| Jang, T-H. et al. 2018[102]          | Y                   | Y                        | N                      | Y              | N        | Y                         | U                              | N                       | Y                           | Y                     |
| Kim, T-W. et al. 2008[74]            | N                   | Y                        | N                      | U              | N        | N                         | N                              | Y                       | N                           | Y                     |
| Yun, S-D. et al. 2017[101]           | N                   | Y                        | N                      | Y              | N        | U                         | N                              | N                       | Y                           | Y                     |
| Oh, E-J. et al. 2014[44]             | N                   | Y                        | N                      | Y              | N        | Y                         | Y                              | U                       | Y                           | Y                     |
| Takahashi, M. et al. 2016[98]        | N                   | Y                        | N                      | N              | N        | Y                         | Y                              | Y                       | Y                           | Y                     |
| Oga, Y. et al. 2019[61]              | N                   | Y                        | N                      | U              | N        | Y                         | Y                              | U                       | Y                           | Y                     |
| Oh, N-H. et al. 2014[87]             | Y                   | Y                        | N                      | Y              | N        | Y                         | Y                              | Y                       | Y                           | Y                     |
| Choi, S-H. et al. 2021[106]          | Y                   | Y                        | N                      | Y              | N        | Y                         | Y                              | Y                       | Y                           | Y                     |
| Bayani, S. et al. 2016[94]           | N                   | Y                        | N                      | Y              | N        | Y                         | U                              | Y                       | Y                           | Y                     |
| Choi, S-H. et al. 2016[96]           | Y                   | Y                        | Y                      | Y              | N        | Y                         | Y                              | Y                       | Y                           | Y                     |
| Yucesoy, T. et al. 2019[104]         | Y                   | Y                        | N                      | Y              | N        | Y                         | N                              | Y                       | Y                           | Y                     |
| Sirisa-Ard, A. et al. 2015[91]       | N                   | Y                        | N                      | Y              | N        | Y                         | U                              | Y                       | Y                           | Y                     |
| Goymen, M. et al. 2015[89]           | Y                   | Y                        | U                      | U              | N        | Y                         | N                              | Y                       | Y                           | Y                     |
| Im, C. et al. 2022[30]               | N                   | Y                        | N                      | Y              | N        | Y                         | N                              | Y                       | Y                           | Y                     |
| Cho, I.C. et al. 2012[78]            | Y                   | Y                        | N                      | Y              | N        | Y                         | Y                              | Y                       | Y                           | Y                     |
| Fernandes, D.J. et al. 2017[20]      | N                   | Y                        | N                      | Y              | N        | Y                         | U                              | Y                       | Y                           | Y                     |
| Pinto, M. et al. 2013[84]            | Y                   | Y                        | N                      | Y              | N        | Y                         | Y                              | Y                       | Y                           | Y                     |
| Kang, H.K. et al. 2016[51]           | Y                   | Y                        | N                      | Y              | N        | Y                         | U                              | Y                       | Y                           | Y                     |
| Cuairán, C. et al. 2014[85]          | Y                   | Y                        | N                      | Y              | N        | Y                         | Y                              | Y                       | Y                           | Y                     |
| Ganzorig, K. et al. 2015[47]         | N                   | Y                        | N                      | Y              | N        | U                         | N                              | Y                       | Y                           | Y                     |
| Omasa, S. et al. 2012[81]            | N                   | Y                        | N                      | Y              | N        | Y                         | Y                              | Y                       | Y                           | Y                     |
| Gansukh, O. et al. 2016[97]          | N                   | Y                        | N                      | Y              | N        | Y                         | Y                              | Y                       | Y                           | Y                     |
| Cha, B-K. et al. 2016[95]            | N                   | Y                        | N                      | Y              | N        | Y                         | Y                              | Y                       | Y                           | Y                     |
| Mo, S.S. et al. 2010[77]             | Y                   | Y                        | N                      | Y              | U        | Y                         | Y                              | Y                       | Y                           | Y                     |
| Uysal, T. et al. 2012[82]            | Y                   | Y                        | N                      | Y              | U        | Y                         | Y                              | Y                       | Y                           | U                     |
| Kim, S-H. et al. 2009[13]            | Y                   | Y                        | U                      | Y              | U        | Y                         | Y                              | Y                       | Y                           | Y                     |
| Espinar-Escalona, E. et al. 2016[28] | N                   | Y                        | N                      | Y              | N        | Y                         | N                              | Y                       | Y                           | Y                     |
| Vilani, G. et al. 2015[93]           | N                   | Y                        | N                      | Y              | N        | Y                         | N                              | Y                       | Y                           | Y                     |
| Liang, Y. et al. 2015[48]            | Y                   | Y                        | U                      | Y              | U        | Y                         | U                              | Y                       | Y                           | Y                     |
| Choi, S-H. et al. 2012[79]           | N                   | Y                        | N                      | N              | N        | N                         | N                              | Y                       | Y                           | U                     |
| Chang, C-S. et al. 2009[75]          | N                   | Y                        | N                      | N              | N        | U                         | N                              | Y                       | N                           | Y                     |

|                                      |   |   |   |   |   |   |   |   |   |   |
|--------------------------------------|---|---|---|---|---|---|---|---|---|---|
| Maino, B. et al. 2017[100]           | Y | Y | N | Y | U | Y | N | Y | Y | Y |
| Aoki, T, et al. 2005[72]             | N | Y | N | U | N | Y | N | Y | Y | Y |
| Tabuchi, M. et al. 2015[92]          | N | Y | N | U | N | Y | Y | Y | Y | Y |
| Hassan, A. et al. 2003[68]           | N | Y | N | Y | N | Y | N | Y | Y | Y |
| Byeon, S. et al. 2023[31]            | N | Y | N | U | N | U | U | Y | U | Y |
| Nishioka-Sakamoto, K. et al 2023[69] | Y | Y | U | Y | Y | Y | U | Y | Y | Y |
| Okawa, K. et al 2023[70]             | Y | Y | Y | Y | U | Y | Y | Y | Y | Y |
| Yamagata, K. et al, 2023[71]         | Y | Y | U | U | U | U | U | Y | Y | Y |

Y- yes, U – unclear, N – No.

Table S5. Assessment of Risk of Bias for in vitro studies.

|                                      | Sturtdred summary | Scientific Background and Explanation of Rationale | Specific Objectives and/or Hypotheses | Intervention for Each Group | Outcome | Sample size | Random Allocation | Allocation Concealment Mechanism | Implementation | Blinding | Statistical Methods | Outcomes and Estimation | Limitations | Funding | Protocol |
|--------------------------------------|-------------------|----------------------------------------------------|---------------------------------------|-----------------------------|---------|-------------|-------------------|----------------------------------|----------------|----------|---------------------|-------------------------|-------------|---------|----------|
| Noorollahian, S. et al. 2012[39]     | Y                 | Y                                                  | Y                                     | Y                           | Y       | N           | Y                 | N                                | Y              | Y        | Y                   | Y                       | N           | Y       | N        |
| Fleischmann, L. et al. 2015[46]      | Y                 | Y                                                  | Y                                     | Y                           | Y       | N           | N                 | N                                | N              | N        | Y                   | Y                       | Y           | Y       | N        |
| Ly, N. et al. 2019[60]               | Y                 | Y                                                  | Y                                     | Y                           | Y       | N           | N                 | N                                | N              | N        | Y                   | Y                       | N           | Y       | N        |
| Pop, S. et al. 2017[53]              | Y                 | Y                                                  | Y                                     | Y                           | Y       | N           | Y                 | N                                | N              | N        | Y                   | Y                       | Y           | Y       | N        |
| Iodice, G. et al. 2019[58]           | Y                 | Y                                                  | Y                                     | Y                           | Y       | N           | N                 | N                                | N              | N        | Y                   | Y                       | Y           | Y       | N        |
| Yadav, S. et al. 2015[50]            | Y                 | Y                                                  | Y                                     | Y                           | Y       | N           | N                 | N                                | N              | N        | Y                   | Y                       | N           | Y       | N        |
| Kim, H-Y. et al. 2016[52]            | Y                 | Y                                                  | Y                                     | Y                           | Y       | N           | Y                 | N                                | N              | N        | Y                   | Y                       | Y           | Y       | N        |
| Li, M. et al. 2022[67]               | Y                 | Y                                                  | Y                                     | Y                           | Y       | N           | N                 | N                                | N              | N        | Y                   | Y                       | Y           | Y       | N        |
| Miyawaki, S. et al. 2015[45]         | Y                 | Y                                                  | Y                                     | Y                           | Y       | N           | N                 | N                                | N              | N        | Y                   | Y                       | Y           | Y       | N        |
| Iwanami-Kadowaki, K. et al. 2021[65] | Y                 | Y                                                  | Y                                     | Y                           | Y       | N           | N                 | N                                | N              | N        | Y                   | Y                       | Y           | Y       | N        |
| Pavlic, A. et al. 2019[62]           | Y                 | Y                                                  | Y                                     | Y                           | Y       | Y           | N                 | N                                | N              | N        | Y                   | Y                       | Y           | Y       | N        |
| Zogheib, T. et al. 2021[66]          | Y                 | Y                                                  | Y                                     | Y                           | Y       | N           | N                 | N                                | N              | N        | Y                   | Y                       | N           | Y       | N        |
| Mattos, C. T. et al. 2011[35]        | Y                 | Y                                                  | Y                                     | Y                           | Y       | N           | Y                 | N                                | N              | N        | Y                   | Y                       | Y           | N       | N        |
| Estelita, S. et al. 2014[43]         | Y                 | Y                                                  | Y                                     | Y                           | Y       | N           | Y                 | N                                | N              | N        | Y                   | Y                       | Y           | N       | N        |
| Alavi, S. et al. 2020[63]            | Y                 | Y                                                  | Y                                     | Y                           | Y       | N           | Y                 | Y                                | Y              | Y        | Y                   | Y                       | Y           | Y       | N        |
| Galli, C. et al. 2012[38]            | Y                 | Y                                                  | Y                                     | Y                           | Y       | N           | N                 | N                                | Y              | Y        | Y                   | Y                       | Y           | Y       | N        |
| Tabuchi, M. et al. 2015[49]          | Y                 | Y                                                  | Y                                     | Y                           | Y       | N           | N                 | N                                | N              | N        | Y                   | Y                       | Y           | N       | N        |
| Tozlu, M. et al. 2013[42]            | Y                 | Y                                                  | Y                                     | Y                           | Y       | N           | N                 | N                                | N              | N        | Y                   | Y                       | Y           | N       | N        |
| Akylcin, S. et al. 2013[40]          | Y                 | Y                                                  | Y                                     | Y                           | Y       | Y           | Y                 | Y                                | Y              | Y        | Y                   | Y                       | Y           | N       | N        |
| Muguruma, T. et al. 2011[36]         | Y                 | Y                                                  | Y                                     | Y                           | Y       | N           | N                 | N                                | N              | N        | Y                   | Y                       | Y           | N       | N        |
| Tejani, H. et al. 2017[54]           | Y                 | Y                                                  | Y                                     | Y                           | Y       | N           | Y                 | N                                | N              | N        | Y                   | Y                       | Y           | N       | N        |
| Oh, E-J. et al. 2014[44]             | Y                 | Y                                                  | Y                                     | Y                           | Y       | N           | Y                 | N                                | N              | N        | Y                   | Y                       | N           | Y       | N        |
| Giri, M. et al. 2020[64]             | Y                 | Y                                                  | Y                                     | Y                           | Y       | Y           | N                 | N                                | N              | N        | Y                   | Y                       | Y           | Y       | N        |
| Oga, Y. et al. 2019[61]              | Y                 | Y                                                  | Y                                     | Y                           | Y       | N           | N                 | N                                | N              | N        | Y                   | Y                       | Y           | Y       | N        |
| Im, C. et al. 2022[30]               | Y                 | Y                                                  | Y                                     | Y                           | Y       | N           | N                 | N                                | N              | N        | Y                   | Y                       | N           | Y       | N        |
| Cho, I.S. et al. 2012[37]            | Y                 | Y                                                  | Y                                     | Y                           | Y       | N           | N                 | N                                | N              | N        | Y                   | Y                       | Y           | N       | N        |
| Hergel, C. et al. 2019[57]           | Y                 | Y                                                  | Y                                     | Y                           | Y       | N           | Y                 | Y                                | N              | N        | Y                   | Y                       | Y           | Y       | N        |
| Fernandes, D.J. et al. 2017[20]      | Y                 | Y                                                  | Y                                     | Y                           | Y       | N           | N                 | N                                | N              | N        | Y                   | Y                       | N           | Y       | N        |
| Mattos, C.T. et al. 2010[29]         | Y                 | Y                                                  | Y                                     | Y                           | Y       | N           | N                 | N                                | N              | N        | Y                   | Y                       | N           | Y       | N        |
| Kang, H.K. et al. 2016[51]           | Y                 | Y                                                  | Y                                     | Y                           | Y       | N           | Y                 | N                                | N              | N        | Y                   | Y                       | Y           | N       | N        |
| Ganzorig, K. et al. 2015[47]         | Y                 | Y                                                  | Y                                     | Y                           | Y       | N           | N                 | N                                | N              | N        | Y                   | Y                       | Y           | Y       | Y        |
| Kaci, N. et al. 2018[55]             | Y                 | Y                                                  | Y                                     | Y                           | Y       | N           | N                 | N                                | N              | N        | N                   | Y                       | N           | N       | N        |
| Serra, G. et al. 2013[41]            | Y                 | Y                                                  | Y                                     | Y                           | Y       | N           | N                 | N                                | N              | N        | Y                   | Y                       | Y           | N       | N        |
| Jongwannasiri, C. et al. 2019[59]    | Y                 | Y                                                  | Y                                     | Y                           | Y       | N           | N                 | N                                | N              | N        | N                   | Y                       | N           | Y       | N        |
| Espinar-Escalona, E. et al. 2016[28] | Y                 | Y                                                  | Y                                     | Y                           | Y       | N           | N                 | N                                | N              | N        | Y                   | Y                       | N           | Y       | N        |
| Liang, Y. et al. 2015[48]            | Y                 | Y                                                  | Y                                     | Y                           | Y       | N           | N                 | N                                | N              | N        | Y                   | Y                       | N           | Y       | N        |
| Pop, S. et al. 2018[56]              | Y                 | Y                                                  | Y                                     | Y                           | Y       | N           | N                 | N                                | N              | N        | Y                   | Y                       | N           | Y       | N        |
| Baser, B. et al. 2023[34]            | Y                 | Y                                                  | Y                                     | Y                           | Y       | N           | N                 | N                                | N              | N        | Y                   | Y                       | Y           | Y       | N        |
| Byeon, S. et al. 2023[31]            | Y                 | Y                                                  | Y                                     | Y                           | Y       | N           | N                 | N                                | N              | N        | Y                   | Y                       | Y           | Y       | N        |
| Gezer, P. et al. 2023[32]            | Y                 | Y                                                  | Y                                     | Y                           | Y       | Y           | N                 | N                                | N              | N        | Y                   | Y                       | Y           | Y       | N        |
| Li, M. et al 2023[33]                | Y                 | Y                                                  | Y                                     | Y                           | Y       | N           | N                 | Y                                | N              | Y        | Y                   | Y                       | Y           | Y       | N        |

Y– yes, N - no.
